# Supplementary material for: Magnetosheath jet evolution as a function of lifetime: Global hybrid-Vlasov simulations compared to MMS observations
Source: Copernicus journal article supplement (doi:10.5194/angeo-2020-49), 2020-07-15
Supplement: Supplementary file 1 [file angeo-2020-49-supplement.pdf]

Supplementary animation S1 can be, for the time being, found from this address:

<https://www.dropbox.com/s/txc2faoagg0s95d/S1.mp4?dl=0>
